# Supplementary material for: Versatile synthesis of end-reactive polyrotaxanes applicable to fabrication of supramolecular biomaterials
Source: publisher site journal article supplement (doi:10.3762/bjoc.12.287), 2016-12-28
Supplement: Additional file 1 [file 1860-5397-12-287-S1.pdf]

## Supporting Information

for

# Versatile synthesis of end-reactive polyrotaxanes applicable to fabrication of supramolecular biomaterials

Atsushi Tamura, Asato Tonegawa, Yoshinori Arisaka, and Nobuhiko Yui\*

Address: Department of Organic Biomaterials, Institute of Biomaterials and Bioengineering, Tokyo Medical and Dental University, 2-3-10 Kanda-Surugadai, Chiyoda, Tokyo 101-0062, Japan

Email: Nobuhiko Yui - yui.org@tmd.ac.jp

\*Corresponding author

### FTIR and $^1\text{H}$ NMR spectra of the PRXs

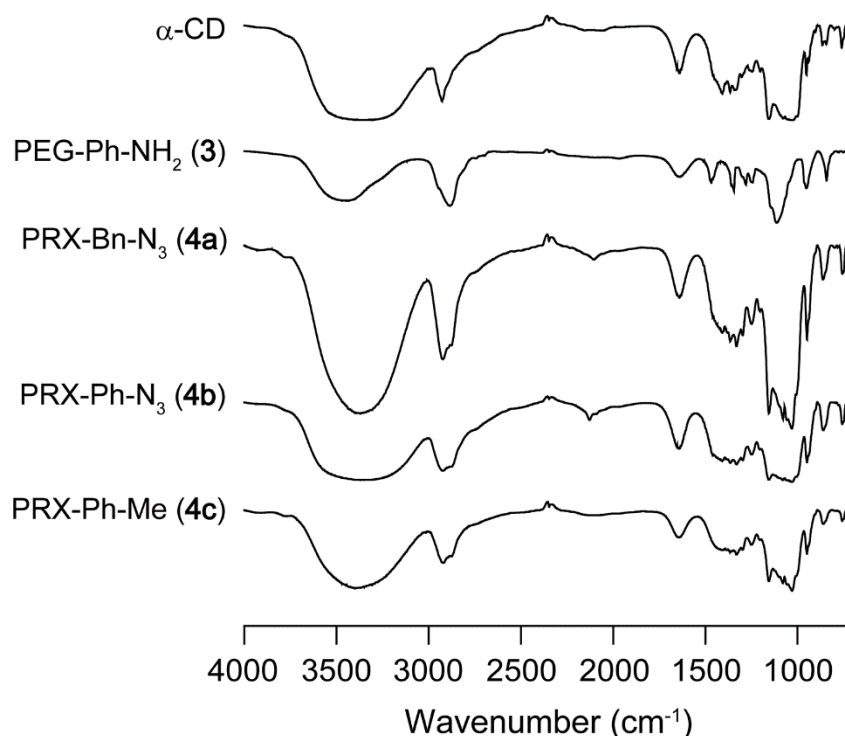

**Figure S1:** FTIR spectra of  $\alpha$ -CD, PEG-Ph-NH<sub>2</sub> (3), PRX-Bn-N<sub>3</sub> (4a), PRX-Ph-N<sub>3</sub> (4b), and PRX-Ph-Me (4c).

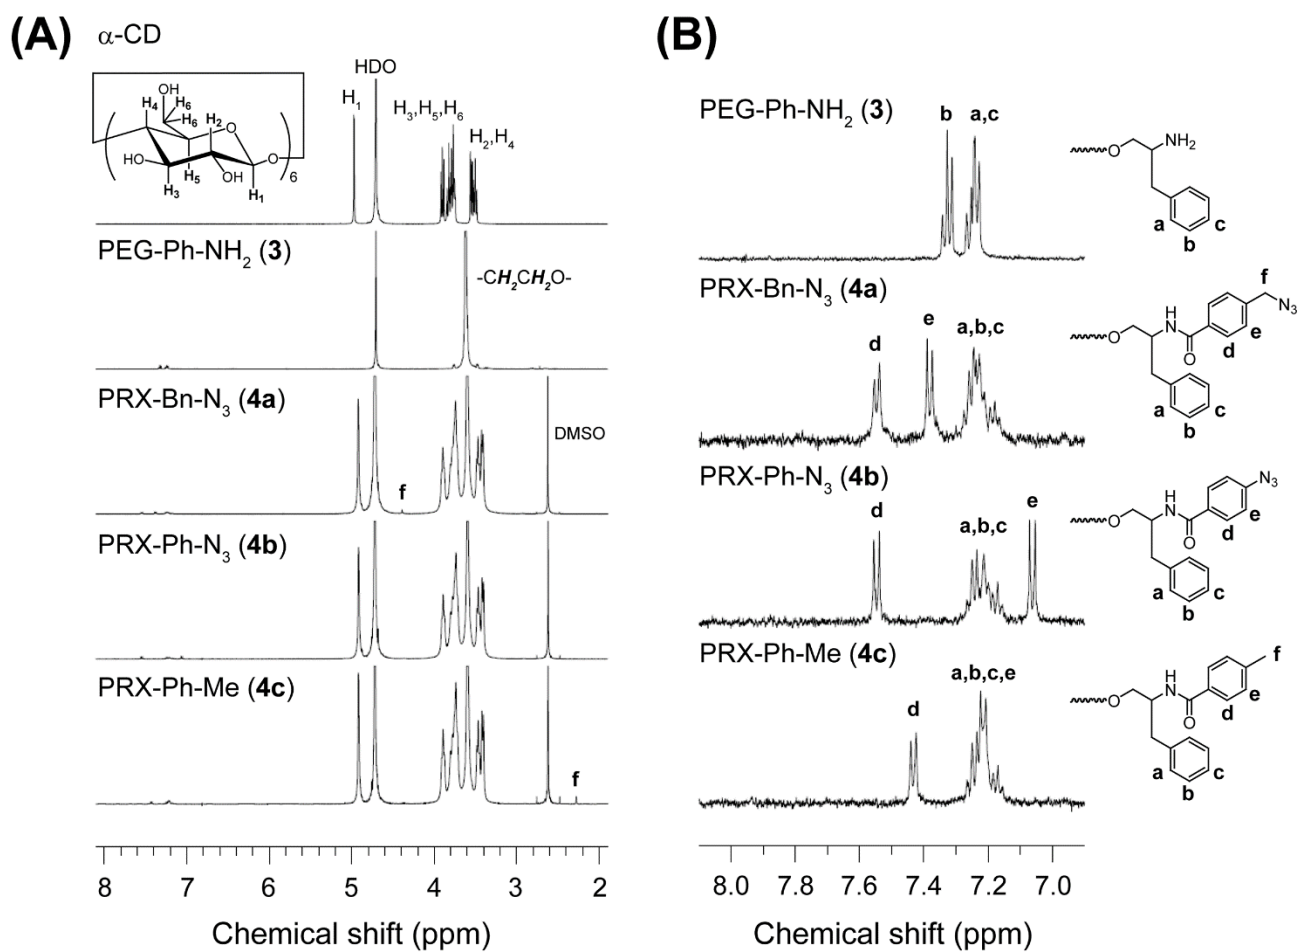

**Figure S2:** (A)  $^1\text{H}$  NMR spectra of  $\alpha$ -CD, PEG-Ph-NH<sub>2</sub> (**3**), PRX-Bn-N<sub>3</sub> (**4a**), PRX-Ph-N<sub>3</sub> (**4b**), and PRX-Ph-Me (**4c**) in NaOD/D<sub>2</sub>O. (B) Enlarged views of  $^1\text{H}$  NMR spectra of PEG-Ph-NH<sub>2</sub> (**3**), PRX-Bn-N<sub>3</sub> (**4a**), PRX-Ph-N<sub>3</sub> (**4b**), and PRX-Ph-Me (**4c**) in NaOD/D<sub>2</sub>O.
